# Supplementary material for: Method development and optimization for dispersive liquid–liquid microextraction factors using the response surface methodology with desirability function for the ultra-high performance liquid chromatography quadrupole time of flight mass spectrometry determination of organic contaminants in water samples: risk and greenness assessment
Source: Royal Society of Chemistry journal article supplement (doi:10.1039/d4ay01462f), 2024-01-01
Supplement: d4ay01462f1.pdf [file d4ay01462f1.pdf]

## Supplementary Information

### Method development and optimization of DLLME factors using RSM with DF for the determination of organic contaminants in water samples by UHPLC–QTOF–MS: Risk and greenness assessment

Tlou Auguston Makwakwa <sup>a, b</sup>, Elsie Dineo Moema <sup>a</sup>, Titus Alfred Makudali Msagati <sup>b\*</sup>

<sup>a</sup>*Department of Chemistry, College of Science, Engineering and Technology, University of South Africa, Florida, 1709, Johannesburg, South Africa.*

<sup>b</sup>*Institute for Nanotechnology and Water Sustainability, College of Science, Engineering and Technology, University of South Africa, Florida, 1709, Johannesburg, South Africa.*

\* Corresponding author Email: [msagatam@unisa.ac.za](mailto:msagatam@unisa.ac.za), Tel +27 11 670 9482

**Table S1** Retention times and mass measurements of molecular ions of target compounds in a mixture standard solution.

| Compound                    | Retention time (min) | Elemental composition                                                   | Experimental mass (m/z) | Theoretical mass (m/z) | Error |      |
|-----------------------------|----------------------|-------------------------------------------------------------------------|-------------------------|------------------------|-------|------|
|                             |                      |                                                                         |                         |                        | mDa   | ppm  |
| <b>ESI (+) mode</b>         |                      |                                                                         |                         |                        |       |      |
| Mifepristone (MIF)          | 4.13                 | [M + H] <sup>+</sup><br>C <sub>29</sub> H <sub>36</sub> NO <sub>2</sub> | 430.2747                | 430.2741               | -0.7  | -1.5 |
| Benzophenone (BP)           | 5.52                 | [M + H] <sup>+</sup><br>C <sub>13</sub> H <sub>11</sub> O               | 183.0806                | 183.0804               | -0.2  | -1.1 |
| <b>ESI (-) Mode</b>         |                      |                                                                         |                         |                        |       |      |
| Eicosapentaenoic acid (EPA) | 7.78                 | [M-H] <sup>-</sup><br>[C <sub>20</sub> H <sub>29</sub> O <sub>2</sub>   | 301.2172                | 301.2173               | 0.4   | 1.3  |
| Docosahexaenoic acid (DHA)  | 8.47                 | [M-H] <sup>-</sup><br>[C <sub>22</sub> H <sub>31</sub> O <sub>2</sub>   | 327.2330                | 327.2328               | 0.3   | 1.0  |

**Table S2** Elemental composition and accurate mass measurement for product ions obtained in a standard solution using the Q–TOF mode.

| Compound   | Precursor ion (m/z) | Product ions                                                     | Error             |                  |      |      |
|------------|---------------------|------------------------------------------------------------------|-------------------|------------------|------|------|
| Compound   |                     | Elemental composition                                            | Experimental mass | Theoretical mass | mDa  | ppm  |
| MIF (ESI+) | 430                 | [C <sub>9</sub> H <sub>11</sub> N] + H <sup>+</sup>              | 134.0965          | 134.0964         | -0.0 | 0.7  |
|            |                     | [C <sub>26</sub> H <sub>31</sub> NO <sup>-</sup> ]H <sup>+</sup> | 372.2329          | 372.2322         | -0.7 | 1.9  |
| BP (ESI+)  | 183                 | [C <sub>6</sub> H <sub>5</sub> ] <sup>+</sup>                    | 77.0382           | 77.0386          | 0.4  | -5.2 |
|            |                     | [C <sub>7</sub> H <sub>5</sub> O] <sup>+</sup>                   | 105.0336          | 105.0335         | -0.1 | 0.9  |
| EPA (ESI-) | 301                 | [C <sub>19</sub> H <sub>29</sub> ] <sup>-</sup>                  | 257.2277          | 257.2280         | 0.6  | -1.2 |
| DHA (ESI-) | 327                 | [C <sup>9</sup> H <sup>14</sup> ] <sup>-</sup> – H <sup>-</sup>  | 121.1023          | 121.1023         | -0.0 | 0.1  |
|            |                     | [C <sub>17</sub> H <sub>25</sub> ] <sup>-</sup>                  | 229.1964          | 229.1962         | -0.2 | 0.8  |
|            |                     | [C <sub>21</sub> H <sub>31</sub> ] <sup>-</sup>                  | 283.2432          | 283.2431         | -0.1 | 0.4  |

**Table S3** Method relative standard deviations (RSD) and enrichment factors (EF)

| Compound | Influent (% RSD) | Influent (EF) | Effluent (% RSD) | Effluent (EF) | River (% RSD) | River (EF) |
|----------|------------------|---------------|------------------|---------------|---------------|------------|
| MIF      | 0.65             | 39.71         | 1.08             | 52.34         | 1.13          | 51.72      |
| BP       | 4.78             | 72.72         | 10.37            | 59.66         | 6.91          | 47.28      |
| DHA      | 10.34            | 61.40         | 14.03            | 11.66         | 8.86          | 33.14      |
| EPA      | 11.63            | 32.42         | 14.12            | 15.57         | 10.23         | 42.52      |
